# Supplementary material for: Menstrual Blood-Derived Endometrial Stem Cells’ Impact for the Treatment Perspective of Female Infertility
Source: MDPI journal article supplement (doi:10.3390/ijms22136774), 2021-06-24
Supplement: s1 [file s1]

**Table S5.** The functions of 19 differently secreted proteins during decidualization of MenSCs characteristic for healthy donors and patients with unexplained infertility

| Protein       | Entry | Description                         | Accession | Process                                                                                                                                                                                                                                                                                                                                                                                |
|---------------|-------|-------------------------------------|-----------|----------------------------------------------------------------------------------------------------------------------------------------------------------------------------------------------------------------------------------------------------------------------------------------------------------------------------------------------------------------------------------------|
| APOC3         | APOC3 | Apolipoprotein C-III                | P02656    | GO:0051004 regulation of lipoprotein lipase activity; GO:0006641 triglyceride metabolic process; GO:0048259 regulation of receptor-mediated endocytosis; GO:0043062 extracellular structure organization; GO:0030100 regulation of endocytosis; hsa04979 Cholesterol metabolism; <b>hsa03320 PPAR signaling pathway</b>                                                                |
| POTEE         | POTEE | POTE ankyrin domain family member E | Q6S8J3    | No process detected                                                                                                                                                                                                                                                                                                                                                                    |
| AHSG          | FETUA | Alpha-2-HS-glycoprotein             | P02765    | GO:0002576 platelet degranulation; GO:0030100 regulation of endocytosis; GO:0010951 negative regulation of endopeptidase activity; GO:0043687 post-translational protein modification; GO:0045055 regulated exocytosis; GO:0052548 regulation of endopeptidase activity                                                                                                                |
| GSN           | GELS  | Gelsolin                            | P06396    | GO:0046686 response to cadmium ion; GO:0048709 oligodendrocyte differentiation; GO:0070613 regulation of protein processing; GO:0051258 protein polymerization; GO:0033273 response to vitamin; GO:0042060 wound healing; GO:0003012 muscle system process; GO:0045055 regulated exocytosis; GO:0052548 regulation of endopeptidase activity; <b>GO:0051015 actin filament binding</b> |
| SPARC - SPARC | SPRC  | SPARC                               | P09486    | <b>GO:0001937 negative regulation of endothelial cell proliferation;</b> GO:0002576 platelet degranulation; GO:0046686 response to cadmium ion; GO:0043062 extracellular structure organization; GO:0030198 extracellular matrix organization; GO:0042060 wound healing; GO:0045055 regulated exocytosis; GO:0050840 extracellular matrix binding; GO:0005518 collagen binding         |
| TIMP1         | TIMP1 | Metalloproteinase inhibitor 1       | P01033    | GO:0002576 platelet degranulation; GO:0022617 extracellular matrix disassembly; GO:0043062 extracellular structure organization; GO:0030198 extracellular matrix organization; GO:0042060 wound healing; GO:0030336 negative                                                                                                                                                           |

|           |       |                          |        |                                                                                                                                                                                                                                                                                                                                                                                                                                                                                                                                                                                                                                                                                                                                                                                                                                                                        |
|-----------|-------|--------------------------|--------|------------------------------------------------------------------------------------------------------------------------------------------------------------------------------------------------------------------------------------------------------------------------------------------------------------------------------------------------------------------------------------------------------------------------------------------------------------------------------------------------------------------------------------------------------------------------------------------------------------------------------------------------------------------------------------------------------------------------------------------------------------------------------------------------------------------------------------------------------------------------|
|           |       |                          |        | regulation of cell migration; GO:0010951 negative regulation of endopeptidase activity; GO:0043687 post-translational protein modification; GO:0045055 regulated exocytosis; GO:0052548 regulation of endopeptidase activity                                                                                                                                                                                                                                                                                                                                                                                                                                                                                                                                                                                                                                           |
| APOH      | APOH  | Beta-2-glycoprotein 1    | P02749 | GO:0051004 regulation of lipoprotein lipase activity; GO:0001937 negative regulation of endothelial cell proliferation; GO:0030195 negative regulation of blood coagulation; GO:0090303 positive regulation of wound healing; GO:0002576 platelet degranulation; GO:0006641 triglyceride metabolic process; GO:0042060 wound healing; GO:0030336 negative regulation of cell migration; GO:0007596 blood coagulation; GO:0045055 regulated exocytosis; hsa04979 Cholesterol metabolism                                                                                                                                                                                                                                                                                                                                                                                 |
| HIST1H2BB | H2B1B | Histone H2B type 1-B     | P33778 | No process detected                                                                                                                                                                                                                                                                                                                                                                                                                                                                                                                                                                                                                                                                                                                                                                                                                                                    |
| VTN       | VTNC  | Vitronectin              | P04004 | GO:0030195 negative regulation of blood coagulation; GO:0090303 positive regulation of wound healing; <b>GO:0030449 regulation of complement activation</b> ; GO:2000257 regulation of protein activation cascade; GO:0048709 oligodendrocyte differentiation; GO:0070613 regulation of protein processing; GO:0048259 regulation of receptor-mediated endocytosis; GO:0051258 protein polymerization; GO:0033273 response to vitamin; GO:0002673 regulation of acute inflammatory response; GO:0043062 extracellular structure organization; GO:0030198 extracellular matrix organization; GO:0030100 regulation of endocytosis; GO:0010951 negative regulation of endopeptidase activity; GO:0052548 regulation of endopeptidase activity; GO:0050840 extracellular matrix binding; GO:0005518 collagen binding; <b>hsa04610 Complement and coagulation cascades</b> |
| MMP1      | MMP1  | Interstitial collagenase | P03956 | GO:0022617 extracellular matrix disassembly; GO:0043062 extracellular structure organization; GO:0030198 extracellular matrix organization; <b>hsa03320 PPAR</b>                                                                                                                                                                                                                                                                                                                                                                                                                                                                                                                                                                                                                                                                                                       |

|       |       |                                    |        |                                                                                                                                                                                                                                                    |
|-------|-------|------------------------------------|--------|----------------------------------------------------------------------------------------------------------------------------------------------------------------------------------------------------------------------------------------------------|
|       |       |                                    |        | <i>signaling pathway; hsa04926 Relaxin signaling pathway</i>                                                                                                                                                                                       |
| CPN1  | CBPN  | Carboxypeptidase N catalytic chain | P15169 | <b>GO:0030449 regulation of complement activation</b> ; GO:2000257 regulation of protein activation cascade; GO:0070613 regulation of protein processing; GO:0002673 regulation of acute inflammatory response                                     |
| PSMB1 | PSB1  | Proteasome subunit beta type-1     | P20618 | GO:0043687 post-translational protein modification; GO:0045055 regulated exocytosis                                                                                                                                                                |
| F5    | FA5   | Coagulation factor V               | P12259 | GO:0002576 platelet degranulation; GO:0042060 wound healing; GO:0043687 post-translational protein modification; GO:0007596 blood coagulation; GO:0045055 regulated exocytosis; hsa04610 Complement and coagulation cascades                       |
| INADL | INADL | InaD-like protein                  | Q8NI35 | <b>hsa04530 Tight junction</b>                                                                                                                                                                                                                     |
| CO3A1 | CO3A1 | Collagen alpha-1(III) chain        | P02461 | GO:0043062 extracellular structure organization; GO:0030198 extracellular matrix organization; GO:0042060 wound healing; GO:0030336 negative regulation of cell migration; GO:0007596 blood coagulation; <b>hsa04926 Relaxin signaling pathway</b> |
| TKT   | TKT   | Transketolase                      | P29401 | No process detected                                                                                                                                                                                                                                |
| KRT77 | K2C1B | Keratin, type II cytoskeletal 1b   | Q7Z794 | No process detected                                                                                                                                                                                                                                |
| MYH4  | MYH4  | Myosin-4                           | Q9Y623 | GO:0003012 muscle system process; <b>GO:0051015 actin filament binding; hsa04530 Tight junction</b>                                                                                                                                                |
| MYH1  | MYH1  | Myosin-1                           | P12882 | GO:0003012 muscle system process; <b>GO:0051015 actin filament binding; hsa04530 Tight junction</b>                                                                                                                                                |
