# Supplementary material for: Menstrual Blood-Derived Endometrial Stem Cells’ Impact for the Treatment Perspective of Female Infertility
Source: MDPI journal article supplement (doi:10.3390/ijms22136774), 2021-06-24
Supplement: s1 [file s1]

**Table S3.** Antibodies used in Western blot analysis

| <b>Antibodies</b>                                                                     | <b>Dilution</b> | <b>Manufacturer</b>                                    |
|---------------------------------------------------------------------------------------|-----------------|--------------------------------------------------------|
| HRP-conjugated secondary antibodies against mouse immunoglobulins (goat, polyclonal)  | 1:2000          | Agilent Dako, Santa Clara, California, USA             |
| HRP-conjugated secondary antibodies against rabbit immunoglobulins (goat, polyclonal) | 1:2000          | Agilent Dako, Santa Clara, California, USA             |
| GAPDH (monoclonal, mouse, clone 6C5)                                                  | 1:10 000        | Abcam, Cambridge, UK                                   |
| P53 (monoclonal, mouse, clone DO-1)                                                   | 1:500           | Santa Cruz Biotechnology, Santa Cruz, California, USA  |
| P21 (monoclonal, mouse, clone 187)                                                    | 1:1000          | Abcam, Cambridge, UK                                   |
| Cyclin A2 (monoclonal, mouse, clone 17B8.2)                                           | 1:10 000        | Millipore, Billerica, Massachusetts, USA               |
| BAX (monoclonal, rabbit, clone 2D2)                                                   | 1:1000          | Cell Signaling Technology, Danvers, Massachusetts, USA |
| C/EBP $\beta$ (monoclonal, mouse)                                                     | 1:500           | Santa Cruz Biotechnology, Santa Cruz, California, USA  |
| Ezh2 (polyclonal, rabbit)                                                             | 1:2000          | Abcam, Cambridge, UK                                   |
| Suz12 (monoclonal, rabbit, clone D39F6)                                               | 1:1000          | Cell Signaling Technology, Danvers, Massachusetts, USA |
| H3K27me3 (polyclonal, rabbit)                                                         | 1:500           | Millipore, Billerica, Massachusetts, USA               |
| HDAC1 (monoclonal, mouse, clone 10E2)                                                 | 1:1000          | Abcam, Cambridge, UK                                   |
| HyperAcH4 (polyclonal, rabbit)                                                        | 1:1000          | Millipore, Billerica, Massachusetts, USA               |
| Pan-Cadherin (polyclonal, rabbit)                                                     | 1:1000          | Santa Cruz Biotechnology, Santa Cruz, California, USA  |
