# Supplementary material for: Menstrual Blood-Derived Endometrial Stem Cells’ Impact for the Treatment Perspective of Female Infertility
Source: MDPI journal article supplement (doi:10.3390/ijms22136774), 2021-06-24
Supplement: s1 [file s1]

**Table S2.** Primers used for RT-qPCR analysis

| <b>Gene name</b> | <b>Forward and reverse primers (5' → 3')</b>           | <b>Product (bp)</b> |
|------------------|--------------------------------------------------------|---------------------|
| <i>ALPL</i>      | F: AGCCCTTCACTGCCATCCTGT<br>R: ATTCTCTCGTTCACCGCCCAC   | 68                  |
| <i>COL2A1</i>    | F: CTGGTGATGATGGTGAAG<br>R: CCTGGATAACCTCTGTGA         | 130                 |
| <i>ESR1</i>      | F: TGGGAATGATGAAAGGTGGGATAC<br>R: AGGTTGGCAGCTCTCATGTC | 130                 |
| <i>FOXO1</i>     | F: TCGTCATAATCTGTCCCTACACA<br>R: CGGCTTCGGCTCTTAGCAAA  | 168                 |
| <i>GAPDH</i>     | F: AGTCCCTGCCACACTCAG<br>R: TACTTTATTGATGGTACATGACAAGG | 123                 |
| <i>HIF1A</i>     | F: CCAACAGTAACCAACCTCAG<br>R: TCCTGTGGTGACTTGTCTT      | 302                 |
| <i>IGFBP1</i>    | F: TTTTACCTGCCAAACTGCAACA<br>R: CCCATTCCAAGGGTAGACGC   | 108                 |
| <i>KLF4</i>      | F: CACATTAATGAGGCAGCCACC<br>R: AAGTCGCTTCATGTGGGAGAG   | 169                 |
| <i>LIN28A</i>    | F: TTGTCTTCTACCCTGCCCTCT<br>R: GAACAAGGGATGGAGGGTTTT   | 151                 |
| <i>NANOG</i>     | F: AGATGCCTCACACGGAGACT<br>R: GTTTGCCTTTGGGACTGGTG     | 96                  |
| <i>NOTCH1</i>    | F: GGTGAGACCTGCCTGAATG<br>R: GTTGGGGTCCTGGCATC         | 102                 |
| <i>OCT4</i>      | F: CGAGAAGGATGTGGTCCGAG<br>R: CAGAGGAAAGGACACTGGTC     | 136                 |
| <i>BGLAP</i>     | F: CACTCCTCGCCCTATTGGC<br>R: CCCTCCTGCTTGGACACAAAG     | 112                 |
| <i>SPPI</i>      | F: GAAGTTTCGCAGACCTGACAT<br>R: GTATGCACCATTCAACTCCTCG  | 91                  |

|                         |                                                         |     |
|-------------------------|---------------------------------------------------------|-----|
| <i>PGR</i>              | F: CAGCCAGAGCCCACAATACA<br>R: GTTGTGCTGCCCTTCCATTG      | 148 |
| <i>PPAR<sub>γ</sub></i> | F: CGACCAGCTGAATCCAGAGT<br>R: TTGCCAAGTCGCTGTCATCT      | 554 |
| <i>PRL</i>              | F: TGACCCTTCGAGACCTGTTTG<br>R: CTTGCTCCTTGTCTTCGGG      | 177 |
| <i>REX1</i>             | F: GCCTTATGTGATGGCTATGTGT<br>R: ACCCCTTATGACGCATTCTATGT | 96  |
| <i>SOX2</i>             | F: TGGACAGTTACGCGCACAT<br>R: CGAGTAGGACATGCTGTAGGT      | 215 |
| <i>VEGFR2</i>           | F: ACTGTCATCCTTACCAATCC<br>R: CTTCCAAGTCCAATACC         | 202 |
| <i>VEGFR3</i>           | F: TGCACGAGGTACATGCCAAC<br>R: GCTGCTCAAAGTCTCTCACGAA    | 120 |
| <i>WNT4</i>             | F: AGGAGGAGACGTGCGAGAAA<br>R: CGAGTCCATGACTTCCAGGT      | 83  |
