# Supplementary material for: Menstrual Blood-Derived Endometrial Stem Cells’ Impact for the Treatment Perspective of Female Infertility
Source: MDPI journal article supplement (doi:10.3390/ijms22136774), 2021-06-24
Supplement: s1 [file s1]

**Table S1.** Antibodies used for Flow cytometry analysis

| <b>Antibody</b> | <b>Fluorescent probe</b> | <b>Isotype control</b> | <b>Manufacturer</b>                      |
|-----------------|--------------------------|------------------------|------------------------------------------|
| <b>CD31</b>     | 488                      | IgG1 κ                 | Biolegend, San Diego, California, USA    |
| <b>HLA-DR</b>   | 488                      | IgG2a κ                | Biolegend, San Diego, California, USA    |
| <b>HLA-ABC</b>  | 488                      | IgG2a κ                | Biolegend, San Diego, California, USA    |
| <b>CD14</b>     | 488                      | IgG1 κ                 | Biolegend, San Diego, California, USA    |
| <b>CD4</b>      | APC                      | Mouse IgG1             | Exbio, Vestec, Czech Republic            |
| <b>CD16</b>     | APC                      | Mouse IgG1 κ           | Exbio, Vestec, Czech Republic            |
| <b>CD44</b>     | APC                      | IgG1 κ                 | Biolegend, San Diego, California, USA    |
| <b>CD105</b>    | APC                      | Mouse IgG2a            | Exbio, Vestec, Czech Republic            |
| <b>CD117</b>    | APC                      | Mouse IgG1 κ           | Exbio, Vestec, Czech Republic            |
| <b>SUSD2</b>    | APC                      | IgG1 κ                 | Biolegend, San Diego, California, USA    |
| <b>BMSC</b>     | APC                      | IgG1                   | Biolegend, San Diego, California, USA    |
| <b>CD8</b>      | APC                      | Mouse IgG2a            | Exbio, Vestec, Czech Republic            |
| <b>CD90</b>     | APC                      | Mouse IgG1 κ           | Exbio, Vestec, Czech Republic            |
| <b>CD56</b>     | APC                      | IgG1 κ                 | Biolegend, San Diego, California, USA    |
| <b>CD133</b>    | APC                      | IgG1 κ                 | Biolegend, San Diego, California, USA    |
| <b>CD146</b>    | APC                      | IgG1 κ                 | Biolegend, San Diego, California, USA    |
| <b>CD13</b>     | APC                      | Mouse IgG1             | Exbio, Vestec, Czech Republic            |
| <b>CD9</b>      | FITC                     | Mouse IgG1             | Exbio, Vestec, Czech Republic            |
| <b>CD45</b>     | FITC                     | IgG1 κ                 | BD Pharmingen, San Jose, California, USA |
| <b>CD73</b>     | FITC                     | Mouse IgG1 κ           | Exbio, Vestec, Czech Republic            |
| <b>CD34</b>     | FITC                     | IgG2a, κ               | Biolegend, San Diego, California, USA    |
| <b>CD3</b>      | PE                       | Mouse IgG2b            | Exbio, Vestec, Czech Republic            |
| <b>CD19</b>     | PE                       | Mouse IgG1             | Exbio, Vestec, Czech Republic            |
| <b>CD15</b>     | PE                       | Mouse IgM              | Exbio, Vestec, Czech Republic            |
| <b>CD166</b>    | PE                       | IgG1 κ                 | Biolegend, San Diego, California, USA    |
