# Supplementary material for: Menstrual Blood-Derived Endometrial Stem Cells’ Impact for the Treatment Perspective of Female Infertility
Source: MDPI journal article supplement (doi:10.3390/ijms22136774), 2021-06-24
Supplement: s1 [file s1]

**Table S6.** Proteins detected in the secretion profile analysis of MenSCs. C - protein secreted by control MenSCs, 6d - proteins secreted by decidualized MenSCs

| Process                                                     | Protein  | Healthy donors | Patients with unexplained infertility | Process                                        | Protein                                        | Healthy donors | Patients with unexplained infertility |
|-------------------------------------------------------------|----------|----------------|---------------------------------------|------------------------------------------------|------------------------------------------------|----------------|---------------------------------------|
|                                                             |          | Ratio 6d/C     | Ratio 6d/C                            |                                                |                                                | Ratio 6d/C     | Ratio 6d/C                            |
| GO:0007566 embryo implantation, GO:0007565 female pregnancy | IGFBP7   | 6.36           | 10.35                                 | hsa04915 Estrogen signaling pathway            | HspA8                                          | 0.165          | 0.24                                  |
|                                                             | IGFBP4   | 2.32           | 5.42                                  |                                                | Hsp90aa1                                       | 0.24           | 0.18                                  |
|                                                             | FBLN1    | 0.665          | 0.72                                  |                                                | Hspa11                                         | 0.13           | 0.07                                  |
|                                                             | Timp1    | 0.455          | 1.14                                  |                                                | Mmp2                                           | 1.975          | 2.22                                  |
|                                                             | Timp2    | 3.135          | 5.57                                  |                                                | Krt9                                           | 1.44           | 2.09                                  |
|                                                             | FSTL1    | 2.29           | 2.22                                  | hsa04926 Relaxin signaling pathway             | Col3a1                                         | 0.685          | 1.3                                   |
|                                                             | PZP      | 11.98          | 26.61                                 |                                                | Col1a2                                         | 7.23           | 5.27                                  |
|                                                             | Vim      | 0.77           | 0.85                                  |                                                | Col4a2                                         | 1.87           | 2.15                                  |
| GO:0031532 actin cytoskeleton reorganization                | GSN      | 0.455          | 2.25                                  | hsa04540 Gap junction, hsa04530 Tight junction | Mmp1                                           | -              | 1.775                                 |
|                                                             | Actn1    | 0.15           | 0.11                                  |                                                | Actn4                                          | -              | 0.073                                 |
|                                                             | Fn1      | 2.3            | 1.39                                  |                                                | Tuba1c                                         | 0.115          | 0.17                                  |
|                                                             | Myh9     | 0.61           | 0.86                                  |                                                | Tubb1                                          | 0.115          | 0.17                                  |
|                                                             | Vcl      | 0.395          | 0.2                                   | hsa00010 Glycolysis/ Gluconeogenesis           | Ldha                                           | -              | 0.09                                  |
|                                                             | Ezr      | 0.015          | 0.06                                  |                                                | Pkm                                            | 0.07           | 0.19                                  |
| Fga                                                         | 0.12     | 0.14           | Eno2                                  |                                                | -                                              | 0.19           |                                       |
| F10                                                         | 4.85     | 1.13           | Aldoa                                 |                                                | 1.02                                           | 1.08           |                                       |
| hsa04610 Complement and coagulation cascades                | Serpine1 | 0.94           | 0.4                                   | hsa00010 Glycolysis/ Gluconeogenesis           | GAPDH                                          | 2.09           | 2.33                                  |
|                                                             | Serpinf2 | -              | 0.19                                  |                                                | GO:0016525 negative regulation of angiogenesis | Thbs2          | 6.8                                   |
|                                                             | CFI      | 0.335          | 0.32                                  | Thbs1                                          |                                                | 3.6            | 1.32                                  |
|                                                             | Plg      | 0.52           | 0.15                                  | hsa04512 ECM-receptor interaction              | Col6a1                                         | 0.66           | 0.66                                  |
|                                                             | C8b      | 0.23           | 0.49                                  |                                                | Col6a3                                         | 0.395          | 0.86                                  |
|                                                             | F5       | 0.56           | 2.6                                   |                                                | Actn1                                          | 0.15           | 0.11                                  |
|                                                             | C3       | 0.2            | 0.29                                  |                                                | Flna                                           | 0.045          | 0.64                                  |
|                                                             | C4a      | 0.16           | 0.18                                  |                                                | Tln1                                           | 0.07           | 0.10                                  |
|                                                             | Vtn      | 0.85           | 1.05                                  |                                                |                                                |                |                                       |
|                                                             | C5       | 0.1            | 0.13                                  |                                                |                                                |                |                                       |
|                                                             | C7       | 1.68           | 1.88                                  |                                                |                                                |                |                                       |
|                                                             | A2M      | 0.08           | 0.12                                  |                                                |                                                |                |                                       |
