# Supplementary material for: Menstrual Blood-Derived Endometrial Stem Cells’ Impact for the Treatment Perspective of Female Infertility
Source: Int J Mol Sci. 2021 Jun 24;22(13):6774. doi: 10.3390/ijms22136774 (PMC8268036; doi:10.3390/ijms22136774)
Supplement: Supplementary file 1 [file ijms-22-06774-s001.zip]

Archive with 6 entries (6 files):
- Table S1.pdf
- Table S2.pdf
- Table S3.pdf
- Table S4.xlsx
- Table S5.pdf
- Table S6.pdf
