# Supplementary material for: Menstrual Blood-Derived Endometrial Stem Cells’ Impact for the Treatment Perspective of Female Infertility
Source: Int J Mol Sci. 2021 Jun 24;22(13):6774. doi: 10.3390/ijms22136774 (PMC8268036; doi:10.3390/ijms22136774)
Supplement: Supplementary file 1 [file ijms-22-06774-s001.zip › Table S4.xlsx]

## Sheet: TOP3 quantification
Table S4. Raw data of secretome analysis by mass spectrometry									Secretion level of proteins in healthy donors control MenSCs		Secretion level of proteins in patients with unexplained infertility control MenSCs			Secretion level of proteins in healthy donors decidua MenSCs		Secretion level of proteins in patients with unexplained infertility control MenSCs
Description	Entry	Isoelectric point (IEP)	Molecular weight (mw)	Max score	Accession	Reported peptides	Sequence coverage	False Discovery Rate (FDR) level	D1	D2	P1	P2	P3	D1	D2	P1	P2	P3
14-3-3 protein sigma OS=Homo sapiens OX=9606 GN=SFN PE=1 SV=1	1433S_HUMAN	4.48	27888.2	2221.46	P31947	3	19.35	0	6355.24	4386.77	5266.34	7765.24	14325.4
Alpha-1B-glycoprotein OS=Homo sapiens OX=9606 GN=A1BG PE=1 SV=4	A1BG_HUMAN	5.48	54823.8	1173.17	P04217	6	24.44	0	14210.7	6264.35	12412	9067.28	22112.4		1045.05	916.466
Alpha-2-antiplasmin OS=Homo sapiens OX=9606 GN=SERPINF2 PE=1 SV=3	A2AP_HUMAN	5.84	54908	3496.76	P08697	5	10.18	0	29971.2	40044.2	35663.1	40688.9	38615.8	3597.12	6717.55	7736.84	4271.13	6462.3
Alpha-2-macroglobulin OS=Homo sapiens OX=9606 GN=A2M PE=1 SV=3	A2MG_HUMAN	6	164717	3169.58	P01023	26	29.72	0	150751	139798	163054	144194	175446	9067.91	14311.4	20580.5	20496.1	17783.7
Alpha/beta hydrolase domain-containing protein 17A OS=Homo sapiens OX=9606 GN=ABHD17A PE=1 SV=1	AB17A_HUMAN	6.41	34617	703.652	Q96GS6	2	19.35	0	183487	93729.5	104808	177581	205088
Beta-actin-like protein 2 OS=Homo sapiens OX=9606 GN=ACTBL2 PE=1 SV=2	ACTBL_HUMAN	5.25	42345.5	9756.71	Q562R1	16	38.03	0	13345.8	8042	10821	37501.8	40128.4	3794.47	5828.5	6624.08	1307.68	5521
Putative beta-actin-like protein 3 OS=Homo sapiens OX=9606 GN=POTEKP PE=5 SV=1	ACTBM_HUMAN	5.88	42358.5	10590.8	Q9BYX7	12	36.27	0		347224	427304				373273	485356	250727
Alpha-actinin-1 OS=Homo sapiens OX=9606 GN=ACTN1 PE=1 SV=2	ACTN1_HUMAN	5.09	103628	2099.24	P12814	31	42.04	0	49422.1	20786	38433.7	40477.7	40603.8	8412.33	2769.67	6614.45	2782	3696
Alpha-actinin-4 OS=Homo sapiens OX=9606 GN=ACTN4 PE=1 SV=2	ACTN4_HUMAN	5.12	105310	1767.79	O43707	28	36.33	0	34602.2	22607.2	30649	22124	27595.5			2901.39	2782
Afamin OS=Homo sapiens OX=9606 GN=AFM PE=1 SV=1	AFAM_HUMAN	5.54	71008.1	3849.68	P43652	11	17.03	0	13497.2	14122.6	14783.5	18365.3	13591.3	82867.8	56664.9	59630.9	61120.2	63160.3
A-kinase anchor protein 9 OS=Homo sapiens OX=9606 GN=AKAP9 PE=1 SV=4	AKAP9_HUMAN	4.76	455269	336.35	Q99996	6	3.53	0	26308.7	31449.7	32067.7	33939.7	28002.7	17556.5	13307	18142	21337	22789
Albumin OS=Homo sapiens OX=9606 GN=ALB PE=1 SV=2	ALBU_HUMAN	5.86	71362.7	7504.31	P02768	19	24.63	0	16056.9	51198	36715.1	15769.8	14410.7	529274	319611	392126	517451	441507
Fructose-bisphosphate aldolase A OS=Homo sapiens OX=9606 GN=ALDOA PE=1 SV=2	ALDOA_HUMAN	8.06	39876.3	842.801	P04075	2	6.59	0	7536.5	13140	8927.5	7965	7702.5	16786	11059.5	16369.5		10936
Aldo-keto reductase family 1 member B1 OS=Homo sapiens OX=9606 GN=AKR1B1 PE=1 SV=3	ALDR_HUMAN	6.55	36252.6	529.799	P15121	5	15.82	0	4199.19	6440.84	2108.87	4793.51				506.667	818.667	674
Alpha-amylase 1 OS=Homo sapiens OX=9606 GN=AMY1A PE=1 SV=2	AMY1_HUMAN	6.48	58452.2	1643.89	P04745	15	43.44	0	16586.7	39184.5	43266.5	42756.6	45332.7	3562.67	2984.25	2966.5	2912.5	6802.67
Pancreatic alpha-amylase OS=Homo sapiens OX=9606 GN=AMY2A PE=1 SV=2	AMYP_HUMAN	6.63	58391.3	1416.97	P04746	12	29.16	0	28539.6	56757.7	67928.5	69270.4	66751.9		2984.25	2966.5
Angiopoietin-related protein 3 OS=Homo sapiens OX=9606 GN=ANGPTL3 PE=1 SV=1	ANGL3_HUMAN	6.34	53865.6	813.048	Q9Y5C1	6	14.57	0	19483.3	23031	35865.3	22130.3	33919.3					1996
Ankyrin repeat domain-containing protein 31 OS=Homo sapiens OX=9606 GN=ANKRD31 PE=2 SV=2	ANR31_HUMAN	5.77	212926	1205.58	Q8N7Z5	3	3.2	0	11324.1	2824.5	3828	3069.5	4380.5	3375		4742		4226
Antithrombin-III OS=Homo sapiens OX=9606 GN=SERPINC1 PE=1 SV=1	ANT3_HUMAN	6.3	53058.8	3008.45	P01008	16	29.09	0	18031.6	12677.7	26871.3	20451.4	28151.1		1438.5
Annexin A2 OS=Homo sapiens OX=9606 GN=ANXA2 PE=1 SV=2	ANXA2_HUMAN	7.78	38832.2	326.166	P07355	2	11.8	0	13342	7734	14008.5	6147			1573	4392
Membrane primary amine oxidase OS=Homo sapiens OX=9606 GN=AOC3 PE=1 SV=3	AOC3_HUMAN	6.04	85192.3	1004.46	Q16853	4	3.54	0		30058.5		35320.6		33794		22996.2	90073
Apolipoprotein A-I OS=Homo sapiens OX=9606 GN=APOA1 PE=1 SV=1	APOA1_HUMAN	5.43	30777.9	14736.4	P02647	4	13.86	0	10450.4	3347.19	5385.37	2259.5	7429.48
Apolipoprotein B-100 OS=Homo sapiens OX=9606 GN=APOB PE=1 SV=2	APOB_HUMAN	6.58	516974	716.219	P04114	38	14.81	0	147335	122086	221106	124373	229636	95475.7	15642.3	26617.3	23964	21302.3
Apolipoprotein C-III OS=Homo sapiens OX=9606 GN=APOC3 PE=1 SV=1	APOC3_HUMAN	5.05	10852.3	17426.5	P02656	3	38.38	0			828.17		1075.33			3282	2127.5	3101
Beta-2-glycoprotein 1 OS=Homo sapiens OX=9606 GN=APOH PE=1 SV=3	APOH_HUMAN	7.87	39609.8	5944.09	P02749	10	29.86	0	16917.6	28340.8	12656.8	13144.2	22975.7	24488.1	19572.3	15645.8	29285.5	27828.1
Apolipoprotein M OS=Homo sapiens OX=9606 GN=APOM PE=1 SV=2	APOM_HUMAN	5.6	21595.5	3155.5	O95445	5	14.89	0	115090	109977	79704.3	109894	93980		1842	32279	16726	21724.5
ADP-ribosylation factor-like protein 10 OS=Homo sapiens OX=9606 GN=ARL10 PE=2 SV=1	ARL10_HUMAN	4.39	27459.4	527.687	Q8N8L6	2	20.9	0	345927	284694	273801	101804	303398		7453.5	5549		8531.5
Apoptosis facilitator Bcl-2-like protein 14 OS=Homo sapiens OX=9606 GN=BCL2L14 PE=1 SV=1	B2L14_HUMAN	6.17	36940.6	1432.32	Q9BZR8	2	9.48	0	8452.81		2023
Transforming growth factor-beta-induced protein ig-h3 OS=Homo sapiens OX=9606 GN=TGFBI PE=1 SV=1	BGH3_HUMAN	7.52	75308.3	11829	Q15582	45	74.82	0	20426.8	25540.9	37988.1	25800.7	37560.6	96197.9	214089	257818	10631.2	16659.7
Betaine--homocysteine S-methyltransferase 1 OS=Homo sapiens OX=9606 GN=BHMT PE=1 SV=2	BHMT1_HUMAN	6.61	45454.8	834.965	Q93088	6	27.59	0	13003.6	5148.12	15535.8	5270.12	15673.5	25701.4				42524
Complement C1q tumor necrosis factor-related protein 3 OS=Homo sapiens OX=9606 GN=C1QTNF3 PE=1 SV=1	C1QT3_HUMAN	6.05	27279.6	1588.79	Q9BXJ4	6	17.89	0	37098	46976.3	47222.3	52443.3	41746.7	7766.5	7544	11676	6850	8003
Caldesmon OS=Homo sapiens OX=9606 GN=CALD1 PE=1 SV=3	CALD1_HUMAN	5.44	93288.2	982.809	Q05682	6	11.1	0	44030.3	4829	14070	5683	6160.67
Adenylyl cyclase-associated protein 1 OS=Homo sapiens OX=9606 GN=CAP1 PE=1 SV=5	CAP1_HUMAN	8.06	52357.8	1446.55	Q01518	18	47.58	0	17758.8	10114.7	14004.8	5377.15	6642.74
Carboxypeptidase N catalytic chain OS=Homo sapiens OX=9606 GN=CPN1 PE=1 SV=1	CBPN_HUMAN	6.92	52571.4	1503.56	P15169	10	24.24	0	15942.4	37838.6	14132.8	52691.7	9750.99	29466.5	13562	9444.95	44786.5	28233.1
CCN family member 2 OS=Homo sapiens OX=9606 GN=CCN2 PE=1 SV=2	CCN2_HUMAN	7.86	40315.6	1839.85	P29279	10	32.09	0	4043.33	5975.67	12061.7	4806.33	6957		34637	55764		8106.67
Ceruloplasmin OS=Homo sapiens OX=9606 GN=CP PE=1 SV=1	CERU_HUMAN	5.34	123061	511.732	P00450	2	3.1	0	53427.5	33208	47610	34741	48353.5
Complement factor I OS=Homo sapiens OX=9606 GN=CFI PE=1 SV=2	CFAI_HUMAN	7.31	68145.5	894.848	P05156	6	11.49	0	51028.3	60879.7	42915.7	54683.7	43610.3	19309.3	17828.5	14262	14919.3	15430
Acidic mammalian chitinase OS=Homo sapiens OX=9606 GN=CHIA PE=1 SV=1	CHIA_HUMAN	5.44	52955.2	754.263	Q9BZP6	3	7.98	0	1291.95	1469.45	1676.02	1685.33	1419.18
C-type lectin domain family 11 member A OS=Homo sapiens OX=9606 GN=CLEC11A PE=1 SV=1	CLC11_HUMAN	4.88	36036.8	1859.42	Q9Y240	11	48.92	0	20921.7	31547.7	35262	27105.7	25029.7	7115.67	5734.67	7821	6567	9780
Chloride intracellular channel protein 1 OS=Homo sapiens OX=9606 GN=CLIC1 PE=1 SV=4	CLIC1_HUMAN	4.9	27264.9	1081.26	O00299	3	13.69	0	15574	11046.7	14237.3	18655	22973	1980	3498	6237	2715	3194
Collagen alpha-1(I) chain OS=Homo sapiens OX=9606 GN=COL1A1 PE=1 SV=5	CO1A1_HUMAN	5.46	139968	3660.91	P02452	49	47.95	0	3284.95	10104.5	12378.3	8465.69			264377	158921	34115.1	49888.6
Collagen alpha-2(I) chain OS=Homo sapiens OX=9606 GN=COL1A2 PE=1 SV=7	CO1A2_HUMAN	9.22	129827	5016.68	P08123	47	53.37	0	8566.67	21693.7	21612	25522.3	7717		313611	203281	33829.4	39246.3
Complement C3 OS=Homo sapiens OX=9606 GN=C3 PE=1 SV=2	CO3_HUMAN	5.96	188688	4358.79	P01024	41	30.01	0	40097.4	89695.3	50331.7	81684.2	38480	13196	7541.51	6754.65	5820.17	26042.5
Collagen alpha-1(III) chain OS=Homo sapiens OX=9606 GN=COL3A1 PE=1 SV=4	CO3A1_HUMAN	6.17	139819	623.1	P02461	21	21.21	0	59288.3	109800	58330.7	97996.7	45680	4272	142301	136928	106614	21378.3
Complement C4-A OS=Homo sapiens OX=9606 GN=C4A PE=1 SV=2	CO4A_HUMAN	6.64	194383	4709.15	P0C0L4	29	21.56	0	295604	306514	316741	251162	249176	57627	37950.7	42535.3	49852.3	50163.3
Collagen alpha-2(IV) chain OS=Homo sapiens OX=9606 GN=COL4A2 PE=1 SV=4	CO4A2_HUMAN	8.74	168751	609.308	P08572	13	15.54	0	2735.33	6637.33	3684.67	5468.33	1549		24758	15192.7		3587
Complement C5 OS=Homo sapiens OX=9606 GN=C5 PE=1 SV=4	CO5_HUMAN	6.08	190016	892.409	P01031	10	7.22	0	263768	192481	223627	191659	216410	28403.7	17644.7	19587.7	29036.3	30316.3
Collagen alpha-1(V) chain OS=Homo sapiens OX=9606 GN=COL5A1 PE=1 SV=3	CO5A1_HUMAN	4.75	184244	702.316	P20908	14	14.53	0	54200.7	59562.3	57300.3	61254.3	52149	6318.67	12768.3	13921.7	6406.5	8442.67
Collagen alpha-1(VI) chain OS=Homo sapiens OX=9606 GN=COL6A1 PE=1 SV=3	CO6A1_HUMAN	5.09	109670	2810.96	P12109	34	49.32	0	106886	142356	110540	144607	89659.3	59261	108426	109491	37392.3	65765.7
Collagen alpha-3(VI) chain OS=Homo sapiens OX=9606 GN=COL6A3 PE=1 SV=5	CO6A3_HUMAN	6.23	345381	944.97	P12111	29	13.94	0	126707	22055	22553.7	24616	18833		17379.7	48229.7	3964	5306
Complement component C7 OS=Homo sapiens OX=9606 GN=C7 PE=1 SV=2	CO7_HUMAN	6.05	96711.9	1692.06	P10643	10	12.22	0	113323	143199	116663	132422	84005.8	206555	220705	215149	182113	203696
Complement component C8 beta chain OS=Homo sapiens OX=9606 GN=C8B PE=1 SV=3	CO8B_HUMAN	8.01	68757.8	821.457	P07358	3	7.61	0	23063.7	20423.3	18979.3	16147.5	29015	2718	6867	8325	12153	7950
Complement component C9 OS=Homo sapiens OX=9606 GN=C9 PE=1 SV=2	CO9_HUMAN	5.27	64656.2	1209.69	P02748	5	12.16	0	51938	50830.2	58303.5	49119.9	61111.7
Cartilage oligomeric matrix protein OS=Homo sapiens OX=9606 GN=COMP PE=1 SV=2	COMP_HUMAN	4.16	85483.8	1763.84	P49747	21	44.78	0	26706	38120	33535.3	33343.1	50689.9
Protein CutA OS=Homo sapiens OX=9606 GN=CUTA PE=1 SV=2	CUTA_HUMAN	5.25	19230.4	1199.1	O60888	2	15.64	0	11426.5	14817	9810	8666	10240.5				1684
Dystroglycan OS=Homo sapiens OX=9606 GN=DAG1 PE=1 SV=2	DAG1_HUMAN	8.74	97783.8	769.61	Q14118	4	6.15	0	3835.74		4087.56	8239.14	7898.46
Dynein heavy chain 10, axonemal OS=Homo sapiens OX=9606 GN=DNAH10 PE=1 SV=4	DYH10_HUMAN	5.52	518035	311.688	Q8IVF4	6	3.82	0	7193.67	8022	4704.33	8161	19011		6526	7057		3938
Dynein heavy chain 11, axonemal OS=Homo sapiens OX=9606 GN=DNAH11 PE=1 SV=4	DYH11_HUMAN	6	524533	290.308	Q96DT5	7	4.65	0	107950	188252	168593	93905.3	117512					1420.5
Dynein heavy chain 12, axonemal OS=Homo sapiens OX=9606 GN=DNAH12 PE=2 SV=2	DYH12_HUMAN	5.77	360022	171.771	Q6ZR08	4	4.66	0	3868	8440	6362	6183.5
Dynein heavy chain 17, axonemal OS=Homo sapiens OX=9606 GN=DNAH17 PE=1 SV=3	DYH17_HUMAN	5.38	513078	937.753	Q9UFH2	18	8.14	0	52106.7	18231.3	124759	42361.7	46691.7	3952	3805	2224.04	4685	5627
Dynein heavy chain 3, axonemal OS=Homo sapiens OX=9606 GN=DNAH3 PE=2 SV=1	DYH3_HUMAN	6	474080	188.05	Q8TD57	5	3.94	0	3889	4814	9542	3787	3174
Dynein heavy chain 5, axonemal OS=Homo sapiens OX=9606 GN=DNAH5 PE=1 SV=3	DYH5_HUMAN	5.7	532843	851.902	Q8TE73	6	2.49	0	2781.67	6595		10010	1175
Dynein heavy chain 7, axonemal OS=Homo sapiens OX=9606 GN=DNAH7 PE=1 SV=2	DYH7_HUMAN	5.61	464696	247.886	Q8WXX0	6	3.03	0			109486		27565.5					8470
Dynein heavy chain 8, axonemal OS=Homo sapiens OX=9606 GN=DNAH8 PE=1 SV=2	DYH8_HUMAN	5.89	518315	323.381	Q96JB1	7	4.05	0	41755.3	31793.7	53017.3	38913	33408.3	3810	38953	4987	26118.7	23437.3
Dynein heavy chain 9, axonemal OS=Homo sapiens OX=9606 GN=DNAH9 PE=1 SV=3	DYH9_HUMAN	5.54	515927	347.861	Q9NYC9	6	2.96	0	28557.6	16050.4	16334.3	16310.9	18285.6	57184	51528	19324.3	71641	73490
Cytoplasmic dynein 2 heavy chain 1 OS=Homo sapiens OX=9606 GN=DYNC2H1 PE=1 SV=4	DYHC2_HUMAN	6.09	496101	374.259	Q8NCM8	15	9.75	0	74279.7	56673	44427.7	306891	62161		4928
Dystonin OS=Homo sapiens OX=9606 GN=DST PE=1 SV=4	DYST_HUMAN	4.96	865796	162.555	Q03001	4	1.85	0	25695.3	28611	34922.3	23127.7	35756.5
Elongation factor 2 OS=Homo sapiens OX=9606 GN=EEF2 PE=1 SV=4	EF2_HUMAN	6.39	96307.8	1611.41	P13639	25	36.25	0	62882.7	38025.7	69105.7	51929.3	58874.3	1668	7924	5198	2101.67	4830
Alpha-enolase OS=Homo sapiens OX=9606 GN=ENO1 PE=1 SV=2	ENOA_HUMAN	7.17	47511.2	1279.36	P06733	14	33.41	0	14675.2	9314.28	11247.6	13910.1	12436.7			8818.75
Beta-enolase OS=Homo sapiens OX=9606 GN=ENO3 PE=1 SV=5	ENOB_HUMAN	7.66	47329.1	658.335	P13929	9	38.94	0	3386.49		3785.43	4512.76	3340.87
Gamma-enolase OS=Homo sapiens OX=9606 GN=ENO2 PE=1 SV=3	ENOG_HUMAN	4.72	47610.8	718.324	P09104	4	13.13	0	5313.22	5551.2	5017.77	3662.34	3407.22					1975
Ezrin OS=Homo sapiens OX=9606 GN=EZR PE=1 SV=4	EZRI_HUMAN	5.87	69527	650.132	P15311	8	24.06	0	41530	68942.4	52553.9	54723.4	29249.1	1171.5		8959.85
Coagulation factor XIII A chain OS=Homo sapiens OX=9606 GN=F13A1 PE=1 SV=4	F13A_HUMAN	5.67	83780.7	525.351	P00488	4	10.11	0	21579.7	21849.3	9324	18890.3	9259.5
Coagulation factor X OS=Homo sapiens OX=9606 GN=F10 PE=1 SV=2	FA10_HUMAN	5.58	56100.4	894.94	P00742	5	13.73	0	18190.3	13099.4	25343.5	33064.9	19161	114747	44242.7		43049.8	40140
Coagulation factor V OS=Homo sapiens OX=9606 GN=F5 PE=1 SV=4	FA5_HUMAN	5.62	252844	941.68	P12259	22	14.52	0	41141.4	41031.3	47662.1	23903	4453.34	25635.8	20190.6	27766.1	21109.7	28336.5
Coagulation factor IX OS=Homo sapiens OX=9606 GN=F9 PE=1 SV=2	FA9_HUMAN	5.19	53147.1	900.249	P00740	7	17.79	0	1567.78	21983.7	71033	47005.5	80753.1
Fibulin-1 OS=Homo sapiens OX=9606 GN=FBLN1 PE=1 SV=4	FBLN1_HUMAN	4.9	81320.1	3296.51	P23142	22	43.53	0	256766	289039	263203	291543	248772	178882	181250	195810	202177	181255
EGF-containing fibulin-like extracellular matrix protein 1 OS=Homo sapiens OX=9606 GN=EFEMP1 PE=1 SV=2	FBLN3_HUMAN	4.77	56921.7	3306.82	Q12805	17	40.37	0	50582.3	55168.3	58420.7	50135.7	47395.7	10825.7	10562.3	13026.7	11268.3	11467
Flap endonuclease 1 OS=Homo sapiens OX=9606 GN=FEN1 PE=1 SV=1	FEN1_HUMAN	8.83	42935.2	496.038	P39748	4	16.84	0	16375.8	13754.4	2563.73	2898.61	17888.5	2775.45	6785.7
Alpha-fetoprotein OS=Homo sapiens OX=9606 GN=AFP PE=1 SV=1	FETA_HUMAN	5.36	70502.5	8787	P02771	21	38.75	0	57369.7	49002.6	48818.3	60074.5	45982.2	24917.3	24669.2	27072.1	17439.2	17894.6
Alpha-2-HS-glycoprotein OS=Homo sapiens OX=9606 GN=AHSG PE=1 SV=2	FETUA_HUMAN	5.33	40139.2	9766.83	P02765	10	37.33	0	114365	42129.8	15797.3	22816.7	3613.74	29600.5	11989.2	16814.2	16696.1	12137.1
Fibrinogen alpha chain OS=Homo sapiens OX=9606 GN=FGA PE=1 SV=2	FIBA_HUMAN	5.61	95714.5	388.043	P02671	2	8.43	0	24538	36896.5	30685	38632	30417	3156	3889	4480	5427	4718
Fibrinogen beta chain OS=Homo sapiens OX=9606 GN=FGB PE=1 SV=2	FIBB_HUMAN	8.25	56612.6	2487.59	P02675	9	16.09	0	26027.3	16015.6	19893.3	14532.9	29731.5
Fibrinogen gamma chain OS=Homo sapiens OX=9606 GN=FGG PE=1 SV=3	FIBG_HUMAN	5.24	52139	514.065	P02679	4	22.3	0			10550.7
Fibronectin OS=Homo sapiens OX=9606 GN=FN1 PE=1 SV=5	FINC_HUMAN	5.17	275913	2297	P02751	77	44.37	0	14339.4	32135.7	22820.9	27901.1	13239.8	2762.47	141684	61685.7	9348.88	14855.4
Filamin-A OS=Homo sapiens OX=9606 GN=FLNA PE=1 SV=4	FLNA_HUMAN	5.64	283477	1178.67	P21333	67	40.54	0	170569	159607	207377	186501	225614	4338.67	8822	150213	95184.3	154740
Fibromodulin OS=Homo sapiens OX=9606 GN=FMOD PE=1 SV=2	FMOD_HUMAN	5.6	43521	785.922	Q06828	7	32.45	0	31087.3			25665.1	2116.24				2835.5
Fibrous sheath-interacting protein 1 OS=Homo sapiens OX=9606 GN=FSIP1 PE=2 SV=1	FSIP1_HUMAN	4.89	66634.6	651.969	Q8NA03	2	4.99	0	25278	750.472	10017.4	9441.9		2682.04			3264.26	1778.48
Follistatin-related protein 1 OS=Homo sapiens OX=9606 GN=FSTL1 PE=1 SV=1	FSTL1_HUMAN	5.23	36126.1	5935.44	Q12841	18	63.64	0	24069.7	22977.7	31117.3	27756.7	21336.7	3510	101703	99274.3	31718	49696.7
Glyceraldehyde-3-phosphate dehydrogenase OS=Homo sapiens OX=9606 GN=GAPDH PE=1 SV=3	G3P_HUMAN	8.7	36224.4	2870.14	P04406	16	66.57	0	65528.7	36352	59200.7	25427.3	17826	143299	72362.3	93538.3	62698.3	52723
Glia-derived nexin OS=Homo sapiens OX=9606 GN=SERPINE2 PE=1 SV=1	GDN_HUMAN	9.7	44230.4	1276.77	P07093	8	30.9	0						4586	34664	20128.3	4880.5	9963.33
Gelsolin OS=Homo sapiens OX=9606 GN=GSN PE=1 SV=1	GELS_HUMAN	5.84	86096.8	9020.1	P06396	32	41.43	0	17180.6	161661	38883.6	98430.5	30378.5	13697	17466.9	12948.2	543986	26789.2
Histone H2B type 1-B OS=Homo sapiens OX=9606 GN=H2BC3 PE=1 SV=2	H2B1B_HUMAN	10.74	13950.2	5831.4	P33778	4	38.1	0	41760	10841.7	10651	16393.5	9083.33	2387		43128	2395	2623
Putative heat shock protein HSP 90-beta-3 OS=Homo sapiens OX=9606 GN=HSP90AB3P PE=5 SV=1	H90B3_HUMAN	4.51	68667.1	824.613	Q58FF7	8	20.1	0			14311.6	5403.62
Hemoglobin subunit alpha OS=Homo sapiens OX=9606 GN=HBA1 PE=1 SV=2	HBA_HUMAN	9.18	15314.6	20544.7	P69905	7	34.51	0	33285		15174.8	35636	35662.5
Hemoglobin subunit beta OS=Homo sapiens OX=9606 GN=HBB PE=1 SV=2	HBB_HUMAN	6.88	16112.5	5364.8	P68871	4	33.33	0	999.075
Heparin cofactor 2 OS=Homo sapiens OX=9606 GN=SERPIND1 PE=1 SV=3	HEP2_HUMAN	6.43	57241.8	773.91	P05546	2	5.01	0	202519	144630		153539		21174	34193	44615	32678
Hepatocyte growth factor activator OS=Homo sapiens OX=9606 GN=HGFAC PE=1 SV=1	HGFA_HUMAN	6.89	72905.9	1755.42	Q04756	11	16.03	0	49192	48957.7	45194	42184	46684.7	5992.33	5255	11444.3	11513.7	9420.67
Hepatocyte growth factor-like protein OS=Homo sapiens OX=9606 GN=MST1 PE=1 SV=2	HGFL_HUMAN	7.49	82886.2	291.735	P26927	6	8.44	0	11889.2	7423.23	11030.6	9809.18	12984.5		2568		2967	2866
Hydrocephalus-inducing protein homolog OS=Homo sapiens OX=9606 GN=HYDIN PE=1 SV=3	HYDIN_HUMAN	5.66	581311	445.762	Q4G0P3	4	2.64	0	72777	86575	41055	240173	165651			13171	8128	8210
Heat shock 70 kDa protein 1-like OS=Homo sapiens OX=9606 GN=HSPA1L PE=1 SV=2	HS71L_HUMAN	5.65	70774.3	495.297	P34931	7	18.56	0	45399.8	34362.2	45678.2	38721.6	49015.8	6690	3932.54	9526.04
Heat shock protein HSP 90-alpha OS=Homo sapiens OX=9606 GN=HSP90AA1 PE=1 SV=5	HS90A_HUMAN	4.75	85059.1	1710.59	P07900	28	46.99	0	22150.3	21284	25940.7	20530.7	28491.7	5316.33	5089	5295.41	3950.67	4241.33
Heat shock protein HSP 90-beta OS=Homo sapiens OX=9606 GN=HSP90AB1 PE=1 SV=4	HS90B_HUMAN	4.77	83606.5	1409.66	P08238	22	40.06	0	16726.7	12893.6	15478.7	10928.3	11086.7			3366.92
Heat shock cognate 71 kDa protein OS=Homo sapiens OX=9606 GN=HSPA8 PE=1 SV=1	HSP7C_HUMAN	5.2	71126.3	1394.59	P11142	18	32.04	0	40724.7	37444	37688	39193	34411.3	6558	6236.94	13014.7	5528.67	8361.67
Serine protease HTRA1 OS=Homo sapiens OX=9606 GN=HTRA1 PE=1 SV=1	HTRA1_HUMAN	7.71	52199.5	1609.43	Q92743	12	36.04	0	1378	1801	2300	1508			42758	89804.7		13487.3
Insulin-like growth factor-binding protein 1 OS=Homo sapiens OX=9606 GN=IGFBP1 PE=1 SV=1	IBP1_HUMAN	4.94	28930.2	3333.29	P08833	5	28.19	0						11139		83046.7	12725	14521
Insulin-like growth factor-binding protein 4 OS=Homo sapiens OX=9606 GN=IGFBP4 PE=1 SV=2	IBP4_HUMAN	6.79	29131.6	3269.84	P22692	5	42.25	0	4761	4032.5	4924.5	4413.5	1634	4441	14954.7	48895	4465.33	8713
Insulin-like growth factor-binding protein 7 OS=Homo sapiens OX=9606 GN=IGFBP7 PE=1 SV=1	IBP7_HUMAN	7.79	30156.8	13524.2	Q16270	13	52.48	0	18812.3	27051	19562	20957.7	9521	24090	309429	321260	72947	106255
InaD-like protein OS=Homo sapiens OX=9606 GN=PATJ PE=1 SV=3	INADL_HUMAN	4.65	197167	867.776	Q8NI35	2	1.44	0						1234.71
Inhibin beta A chain OS=Homo sapiens OX=9606 GN=INHBA PE=1 SV=2	INHBA_HUMAN	7.93	48240.7	786.622	P08476	5	11.74	0	19062	16299.5	15035	10554	23425.5	22970	32012	30036	22522.5	17502
Inter-alpha-trypsin inhibitor heavy chain H2 OS=Homo sapiens OX=9606 GN=ITIH2 PE=1 SV=2	ITIH2_HUMAN	6.4	106920	2129.86	P19823	22	31.5	0	154659	149408	154910	136069	149183	80702.3	246987	264900	150280	197139
Inter-alpha-trypsin inhibitor heavy chain H3 OS=Homo sapiens OX=9606 GN=ITIH3 PE=1 SV=2	ITIH3_HUMAN	5.38	100135	1768.75	Q06033	19	32.02	0	11256.2	28703.7	13346.2	30924.1	8989.26	30151.8	17781.9	47765.4	32446.4	154527
Inter-alpha-trypsin inhibitor heavy chain H4 OS=Homo sapiens OX=9606 GN=ITIH4 PE=1 SV=4	ITIH4_HUMAN	6.53	103586	2636.71	Q14624	15	32.58	0	33408.9	60055.2	52543.5	71103.4	42740.7	47300.6		60482.4	11825.6	68593.2
Keratin, type I cytoskeletal 9 OS=Homo sapiens OX=9606 GN=KRT9 PE=1 SV=3	K1C9_HUMAN	4.96	62292.5	484.635	P35527	4	18.46	0	13239.3	4946	6404	4532	3283	26076	4500.5	7597	5140.5	12978
Keratin, type II cytoskeletal 1 OS=Homo sapiens OX=9606 GN=KRT1 PE=1 SV=6	K2C1_HUMAN	8.27	66209.9	2000.95	P04264	14	22.2	0	57649.3	25624	31107	12263.7	20363.7	29997.3	2921.12	8466.87	18617	13275.3
Keratin, type II cytoskeletal 1b OS=Homo sapiens OX=9606 GN=KRT77 PE=1 SV=3	K2C1B_HUMAN	5.63	62186.6	409.662	Q7Z794	4	7.61	0	96733.6	81066.7	59819.9	77271.2	76442.4	67281	55759.9	47148.7	134548	48727
Plasma kallikrein OS=Homo sapiens OX=9606 GN=KLKB1 PE=1 SV=1	KLKB1_HUMAN	8.1	73479.8	316.237	P03952	5	10.97	0	58036.9		11597.9	154274		1322449	1322169	1254062	1300894
Pyruvate kinase PKM OS=Homo sapiens OX=9606 GN=PKM PE=1 SV=4	KPYM_HUMAN	7.75	58507.3	3818.34	P14618	26	66.48	0	83000	151095	62180	47579	67868	6631	9291.67	17319	6199	10315.7
L-lactate dehydrogenase A chain OS=Homo sapiens OX=9606 GN=LDHA PE=1 SV=2	LDHA_HUMAN	8.37	36973.9	1529.66	P00338	8	36.45	0	47928.6	27621.4	17560.3	31353.8	27068.2					7449.68
Galectin-1 OS=Homo sapiens OX=9606 GN=LGALS1 PE=1 SV=2	LEG1_HUMAN	5.14	15057.9	3078.63	P09382	6	64.44	0	33017.7	11342	51107.7	16629.3	16100.3	3059.5	15885.3	20741.3	2970	7759
Prolow-density lipoprotein receptor-related protein 1 OS=Homo sapiens OX=9606 GN=LRP1 PE=1 SV=2	LRP1_HUMAN	5.01	523483	291.134	Q07954	38	14.99	0	112755	115609	125948	115638	113395	9245	5215.67	8777.67	2990	3592.5
Lumican OS=Homo sapiens OX=9606 GN=LUM PE=1 SV=2	LUM_HUMAN	6.16	38771.2	5516.06	P51884	12	34.91	0	21913.4	27088.3	13071.6	22301.8	11382.7		9595.47	13359.1
Microtubule-actin cross-linking factor 1, isoforms 1/2/3/5 OS=Homo sapiens OX=9606 GN=MACF1 PE=1 SV=4	MACF1_HUMAN	5.11	843555	864.146	Q9UPN3	30	8.28	0	43769.7	136705	152698	273993	144276	5215	141050	5262.5	148288	214014
Midasin OS=Homo sapiens OX=9606 GN=MDN1 PE=1 SV=2	MDN1_HUMAN	5.34	638410	199.788	Q9NU22	4	6.18	0	96021	92659	2411	88685.3	1324
Myosin-1 OS=Homo sapiens OX=9606 GN=MYH1 PE=1 SV=3	MYH1_HUMAN	5.45	224115	298.314	P12882	3	2.94	0	5179	1554.5	2525.98	2126	9603.64			50656	84415.3
Myosin-4 OS=Homo sapiens OX=9606 GN=MYH4 PE=2 SV=2	MYH4_HUMAN	5.53	224041	310.094	Q9Y623	2	1.5	0	14937	9627	15711		16515.9		5519	50656	84415.3
Myosin-9 OS=Homo sapiens OX=9606 GN=MYH9 PE=1 SV=4	MYH9_HUMAN	5.34	227787	642.738	P35579	17	11.73	0	39882.3	21840.7	25222.3	19056	23721.7	30160	10116	15279.3	20602.5	20794
Myosin light chain 6B OS=Homo sapiens OX=9606 GN=MYL6B PE=1 SV=1	MYL6B_HUMAN	5.42	22878.1	1713.63	P14649	3	18.75	0	3855.56		3976.57						1676
Interstitial collagenase OS=Homo sapiens OX=9606 GN=MMP1 PE=1 SV=3	MMP1_HUMAN	6.5	54178.1	1970.6	P03956	7	18.55	0	10622.7		19624.3	1690	4491.67			15771.3		12358
72 kDa type IV collagenase OS=Homo sapiens OX=9606 GN=MMP2 PE=1 SV=2	MMP2_HUMAN	5.09	74965.9	7047.86	P08253	29	51.52	0	10900.7	10500.3	33710.5	30327.2	20348.6	1764.5	39821.3	166907	11814.7	26859
Neurofilament light polypeptide OS=Homo sapiens OX=9606 GN=NEFL PE=1 SV=3	NFL_HUMAN	4.43	61573.7	542.46	P07196	2	16.94	0	4285.22	4406.75	4445.29	4547.22	3313.59
Nucleobindin-1 OS=Homo sapiens OX=9606 GN=NUCB1 PE=1 SV=4	NUCB1_HUMAN	4.98	53879.4	582.597	Q02818	13	38.61	0	28659.8	47562.7	39502.7	47755.8	27362.4	9182.59	13968.3	23287.2	8563.82	12150.2
Out at first protein homolog OS=Homo sapiens OX=9606 GN=OAF PE=2 SV=1	OAF_HUMAN	6.41	31258.6	646.486	Q86UD1	5	22.71	0	7521	9215	8355	11077.3	8907.33	1561	1528		1605	1903
Plasminogen activator inhibitor 1 OS=Homo sapiens OX=9606 GN=SERPINE1 PE=1 SV=1	PAI1_HUMAN	6.75	45117.1	3132.16	P05121	18	43.03	0	44694	27172.3	93434.7	42573	28658		51125.3	54555.3	7091.33	29497.3
Pericentrin OS=Homo sapiens OX=9606 GN=PCNT PE=1 SV=4	PCNT_HUMAN	5.26	380832	293.692	O95613	4	2.52	0	52314	21929.3	39261.7	47483	34503			8951	6956	9076
Procollagen C-endopeptidase enhancer 1 OS=Homo sapiens OX=9606 GN=PCOLCE PE=1 SV=2	PCOC1_HUMAN	7.27	48828	931.895	Q15113	10	24.72	0	24845.3	24614.3	30785	30068.7	31327	1710.5	32025.7	42993.7	13238	19825.7
Pigment epithelium-derived factor OS=Homo sapiens OX=9606 GN=SERPINF1 PE=1 SV=4	PEDF_HUMAN	5.94	46483.3	6474.75	P36955	7	24.64	0	17009.1	136094		121516	18547
Phosphoglycerate kinase 1 OS=Homo sapiens OX=9606 GN=PGK1 PE=1 SV=3	PGK1_HUMAN	8.15	45014	546.47	P00558	10	33.09	0	5581.68					3208.33	2754	3196.5	4256	3495
Plectin OS=Homo sapiens OX=9606 GN=PLEC PE=1 SV=3	PLEC_HUMAN	5.63	533787	233.84	Q15149	4	2.6	0	19670.5	13463	16470	12786.3	15153.7		4193			4955
Plasminogen OS=Homo sapiens OX=9606 GN=PLG PE=1 SV=2	PLMN_HUMAN	6.91	93306.4	3130.3	P00747	25	37.16	0	29149.2	46931.3	196422	179702	206906	24648.6	8424.78	26100.8	29059.8	31559
Plastin-2 OS=Homo sapiens OX=9606 GN=LCP1 PE=1 SV=6	PLSL_HUMAN	5.12	70858.8	809.545	P13796	13	29.82	0	14077.3	6901	10989	9911.33	17898.3		2162		986.5	1307.52
Phospholipid transfer protein OS=Homo sapiens OX=9606 GN=PLTP PE=1 SV=1	PLTP_HUMAN	6.57	54967.7	426.545	P55058	4	7.3	0	28094.3	38869.5	30026.7	31497	29547.5	11378	11195	16464	14989	17189
Periostin OS=Homo sapiens OX=9606 GN=POSTN PE=1 SV=2	POSTN_HUMAN	7.28	93941.4	7205.48	Q15063	45	56.1	0	228415	227995	208136	231883	208241	24545	59750	52911.3	43223.7	46173.3
POTE ankyrin domain family member E OS=Homo sapiens OX=9606 GN=POTEE PE=2 SV=3	POTEE_HUMAN	5.77	122961	15546	Q6S8J3	30	43.72	0	3708.87	8869.36	92401.1	6089.31	2685.15		19815.4	24409	5735.34
POTE ankyrin domain family member F OS=Homo sapiens OX=9606 GN=POTEF PE=1 SV=2	POTEF_HUMAN	5.77	123099	12726.1	A5A3E0	27	40.47	0	34001.5	57542.5	59738.9	70089.6	49894.9	229157	164364	100857	28525.5	87158.7
POTE ankyrin domain family member J OS=Homo sapiens OX=9606 GN=POTEJ PE=3 SV=1	POTEJ_HUMAN	5.57	118816	10456	P0CG39	22	33.33	0	100480	23217.5	7173	18486.7	138066	15426.9	8433.52	4282.45	3577.91	1379.1
Peroxiredoxin-1 OS=Homo sapiens OX=9606 GN=PRDX1 PE=1 SV=1	PRDX1_HUMAN	8.24	22338.5	1559.59	Q06830	5	27.64	0	21264.3	19438.7	17229.7	18563.7	12727.3	6482	12066	26666	5413	9943
Peroxiredoxin-6 OS=Homo sapiens OX=9606 GN=PRDX6 PE=1 SV=3	PRDX6_HUMAN	5.96	25149.1	2136.71	P30041	9	45.54	0	11155.3	942.054	16663.2	11103.3	10800.1			1647
Vitamin K-dependent protein S OS=Homo sapiens OX=9606 GN=PROS1 PE=1 SV=1	PROS_HUMAN	5.34	77175.7	322.386	P07225	5	13.46	0	1448.47		1026.44		1166.59
Proteasome subunit beta type-1 OS=Homo sapiens OX=9606 GN=PSMB1 PE=1 SV=2	PSB1_HUMAN	8.22	26717.5	1394.43	P20618	4	30.29	0	9662	8092.67	9629	7472	9407	11141	6675	6249	9040	10486
Pregnancy zone protein OS=Homo sapiens OX=9606 GN=PZP PE=1 SV=4	PZP_HUMAN	5.93	165346	1955.37	P20742	17	19.23	0	6493.83	2416.02	5524.12	12753.8	8009.47	140357	5703.09	200557	246669	174319
Reticulocalbin-1 OS=Homo sapiens OX=9606 GN=RCN1 PE=1 SV=1	RCN1_HUMAN	4.67	38890	685.399	Q15293	5	22.96	0	17581	29771.3	25448.3	23239	21061.3	6659	12567	13981	8901	8796
Reticulocalbin-3 OS=Homo sapiens OX=9606 GN=RCN3 PE=1 SV=1	RCN3_HUMAN	4.56	37493	3096.28	Q96D15	11	64.02	0	9458.29	2541.69	3772.38
Retinol-binding protein 4 OS=Homo sapiens OX=9606 GN=RBP4 PE=1 SV=3	RET4_HUMAN	5.67	23352.2	3235.42	P02753	7	37.81	0	6659.79	3605.2	3488.91		2089.09
Ras-related protein Rap-1b-like protein OS=Homo sapiens OX=9606 PE=2 SV=1	RP1BL_HUMAN	5.17	21153	959.851	A6NIZ1	5	44.02	0	4443.63	4214.96	3498.21	33283.3	4461.42
Sacsin OS=Homo sapiens OX=9606 GN=SACS PE=1 SV=2	SACS_HUMAN	6.6	526830	240.691	Q9NZJ4	5	4	0	2529.33	10454	6089.67	10712
Serpin H1 OS=Homo sapiens OX=9606 GN=SERPINH1 PE=1 SV=2	SERPH_HUMAN	9.04	46554.7	383.334	P50454	7	21.77	0	5743.65	2411.93	5893.43	2580.21	5761.46		817.5	1026
Nesprin-1 OS=Homo sapiens OX=9606 GN=SYNE1 PE=1 SV=4	SYNE1_HUMAN	5.23	1.01776e+06	992.471	Q8NF91	31	7.63	0	100471	65863	111621	94014.7	197833	51055.3	70010.3	54522	80806.7	42579.3
Nesprin-2 OS=Homo sapiens OX=9606 GN=SYNE2 PE=1 SV=3	SYNE2_HUMAN	5.09	802318	318.849	Q8WXH0	25	7.61	0	112464	97659.3	133845	101482	118634	84427	80869.3	82462.3	79452.3	84255.7
SPARC OS=Homo sapiens OX=9606 GN=SPARC PE=1 SV=1	SPRC_HUMAN	4.54	35487.6	7581.44	P09486	17	64.03	0	140218	103152	178357	105245	120050	2980.5	286737	151230	35626.3	49130.7
SPARC-like protein 1 OS=Homo sapiens OX=9606 GN=SPARCL1 PE=1 SV=2	SPRL1_HUMAN	4.53	76063.3	450.173	Q14515	7	19.43	0	6977.33	11011	34391.3	11984	7789.33
Polycomb protein SUZ12 OS=Homo sapiens OX=9606 GN=SUZ12 PE=1 SV=3	SUZ12_HUMAN	8.99	83796.3	445.345	Q15022	3	7.98	0	38944.5	19132	25166	29548	26228.5	3971		11645		10739
Transgelin-2 OS=Homo sapiens OX=9606 GN=TAGLN2 PE=1 SV=3	TAGL2_HUMAN	8.45	22562.6	1935.62	P37802	10	65.83	0	69326.7	88291.3	84901	101871	76732.7			4171.33	2597
Tubulin alpha-1C chain OS=Homo sapiens OX=9606 GN=TUBA1C PE=1 SV=1	TBA1C_HUMAN	4.79	50579.7	3878.96	Q9BQE3	21	47.22	0	39163.8	54683.6	45142.1		39999.5	5049.28	5700.14	11079.5	10325.2	10707.5
Tubulin alpha-8 chain OS=Homo sapiens OX=9606 GN=TUBA8 PE=1 SV=1	TBA8_HUMAN	4.76	50778	1901.38	Q9NY65	14	44.77	0	6118.22	4569.72	6450.53	11023.9	6621.81				853.958
Tubulin beta-1 chain OS=Homo sapiens OX=9606 GN=TUBB1 PE=1 SV=1	TBB1_HUMAN	4.88	50897.3	1537.94	Q9H4B7	8	21.29	0	23604	23203.7	34234	26606.3	30106.3	2438.55	2986.21	4532.54	3523.62	7382
Tubulin beta-2A chain OS=Homo sapiens OX=9606 GN=TUBB2A PE=1 SV=1	TBB2A_HUMAN	4.59	50306.3	2849.89	Q13885	15	35.28	0	8205.85	7232.06	10913.5	8828.54	7876.65		2730.66
Tubulin beta-6 chain OS=Homo sapiens OX=9606 GN=TUBB6 PE=1 SV=1	TBB6_HUMAN	4.58	50313.5	1856.63	Q9BUF5	9	24.89	0	3256.93		1978.72		1844.05
Thyroxine-binding globulin OS=Homo sapiens OX=9606 GN=SERPINA7 PE=1 SV=2	THBG_HUMAN	5.85	46666.8	1570.07	P05543	10	40.24	0	17695.3	26919.4	21580.9	27413.3	23879.9	92510.4	69321.4	51082.8	58613.9	62696
Prothrombin OS=Homo sapiens OX=9606 GN=F2 PE=1 SV=2	THRB_HUMAN	5.53	71519.7	4258.5	P00734	11	15.59	0		30477.4	11937.2	24731.1					8288.21
Metalloproteinase inhibitor 1 OS=Homo sapiens OX=9606 GN=TIMP1 PE=1 SV=1	TIMP1_HUMAN	8.02	23855.2	6590.63	P01033	9	56.52	0	67842.3	101152	46118.7	55616.7	16382.7		91925.7	89587	10283	21330
Metalloproteinase inhibitor 2 OS=Homo sapiens OX=9606 GN=TIMP2 PE=1 SV=2	TIMP2_HUMAN	7.36	25083.6	4571.7	P16035	9	39.55	0	8858	6386	7132	8334	5871	2446	38222.3	88718	6344.33	20711.7
Transketolase OS=Homo sapiens OX=9606 GN=TKT PE=1 SV=3	TKT_HUMAN	7.48	68562.1	497.87	P29401	10	22.15	0	6035.99	6582.84	4423.48	5325.43		1873.58	3751.59	12204.5
Talin-1 OS=Homo sapiens OX=9606 GN=TLN1 PE=1 SV=3	TLN1_HUMAN	5.69	271935	2262.54	Q9Y490	82	43.29	0	77682	80392.7	71172	73009	67553.7	4887.33	6283.33	9057	7492.33	5494.67
Tropomyosin alpha-4 chain OS=Homo sapiens OX=9606 GN=TPM4 PE=1 SV=3	TPM4_HUMAN	4.47	28635.9	692.559	P67936	7	23.79	0	52469.7	32326.7	46221.7	36340.7	23094.5
Lactotransferrin OS=Homo sapiens OX=9606 GN=LTF PE=1 SV=6	TRFL_HUMAN	8.01	80063.9	732.968	P02788	9	19.72	0	3425.3		7969.45		4558.54	14992	7588.85		9598.27	5234.24
Thrombospondin-1 OS=Homo sapiens OX=9606 GN=THBS1 PE=1 SV=2	TSP1_HUMAN	4.53	133375	5983.28	P07996	69	69.23	0	34393	22445.1	30115.3	21179.4	29925.5	13723.2	151869	63715.8	21229.7	25012.5
Thrombospondin-2 OS=Homo sapiens OX=9606 GN=THBS2 PE=1 SV=2	TSP2_HUMAN	4.43	133869	555.678	P35442	10	14.16	0	2784.59	3801.51	5180.46	7424			51691.6	58249	4899.35	2880.06
Thrombospondin-4 OS=Homo sapiens OX=9606 GN=THBS4 PE=1 SV=2	TSP4_HUMAN	4.25	108550	1220.83	P35443	9	15.3	0	4239.59	3794.23	2588.97	4073.54
Vimentin OS=Homo sapiens OX=9606 GN=VIM PE=1 SV=4	VIME_HUMAN	4.86	53708.8	2939.34	P08670	28	63.3	0	104955	49737.3	66377.2	44200	42398.3	4741.83	74099.3	107063	5156.83	34681.7
Vinculin OS=Homo sapiens OX=9606 GN=VCL PE=1 SV=4	VINC_HUMAN	5.35	124370	6098	P18206	57	56.53	0	225655	218102	245214	229205	234872	166270	10629	129090	9083.67	8295.67
Vacuolar protein sorting-associated protein 13C OS=Homo sapiens OX=9606 GN=VPS13C PE=1 SV=1	VP13C_HUMAN	6.36	424729	774.404	Q709C8	9	5.2	0	59860	122772	67933	227201	69776	11048	6566	11542.5	5013	20531
Vitamin D-binding protein OS=Homo sapiens OX=9606 GN=GC PE=1 SV=2	VTDB_HUMAN	5.16	54514.4	21694.8	P02774	14	25.32	0	33747	8241.99	25048.7	22224.8	9624.85	31739.3	17545.6	28355.4	30277.3	28811.9
Vitronectin OS=Homo sapiens OX=9606 GN=VTN PE=1 SV=1	VTNC_HUMAN	5.43	55104	2311.16	P04004	9	36.61	0	62090.7	38645.3	34187.3	36659.3	34868.3	46348.7	36692.3	32475	40960.7	37758.7
WASH complex subunit 4 OS=Homo sapiens OX=9606 GN=WASHC4 PE=1 SV=2	WASC4_HUMAN	7.08	137430	635.401	Q2M389	2	2.3	0		606.669				2787.73			2570.19	1067.6
WD repeat-containing protein 1 OS=Homo sapiens OX=9606 GN=WDR1 PE=1 SV=4	WDR1_HUMAN	6.18	66877.9	426.962	O75083	8	21.95	0	10596.9	4011	33359.7	12090.3	20944.3
Protein Z-dependent protease inhibitor OS=Homo sapiens OX=9606 GN=SERPINA10 PE=1 SV=1	ZPI_HUMAN	8.55	50821.2	928.887	Q9UK55	4	11.71	0	74931	74973.3	63200	87611.3	64689.3	28278.5	29176	49600.5	105839	33016
